# Supplementary material for: The importance of mineral determinations to PROFILE base cation weathering release rates: A case study
Source: Copernicus journal article supplement (doi:10.5194/bg-2018-522), 2019-01-18
Supplement: Supplementary file 1 [file bg-2018-522-supplement.pdf]

**Table S1a:** XRPD Mineralogical composition (weight %) of the fine-earth (<2mm) fraction of soils from two forest soils from Asa. Diocct.=dioctahedral phyllosilicates; Trioct.=trioctahedral phyllosilicates.

| Site | Plot | Depth  | Quartz | K-feldspar | Plagioclase | Amphibole | Epidote | Anatase | Ilmenite | Hematite | Chlorite trioct. | Mica dioct. | Mica trioct. | Vermiculite dioct. | Vermiculite trioct. | Hydrobiotite | Kaolinite | Imogolite/Allophane | Ferrihydrate | Total |     |
|------|------|--------|--------|------------|-------------|-----------|---------|---------|----------|----------|------------------|-------------|--------------|--------------------|---------------------|--------------|-----------|---------------------|--------------|-------|-----|
| Asa  | K1   | 0-10   | 43,6   | 15,3       | 25,1        | 2,6       | 2,6     | 3,2     | 0,0      | 0,6      | 0,9              | 3,3         | 0,0          | 0,9                | 0,2                 | 0,7          | 0,0       | 1,8                 | 0,8          | 100   |     |
| Asa  | K1   | 10-20  | 44,0   | 15,3       | 25,7        | 2,4       | 2,4     | 3,0     | 0,0      | 0,6      | 1,0              | 0,9         | 2,9          | 0,2                | 1,2                 | 0,2          | 0,2       | 1,6                 | 1,0          | 100   |     |
| Asa  | K1   | 20-30  | 44,2   | 14,4       | 25,2        | 2,5       | 2,5     | 3,2     | 0,0      | 0,5      | 0,9              | 1,0         | 3,5          | 0,0                | 1,1                 | 0,2          | 0,5       | 0,0                 | 1,9          | 0,8   | 100 |
| Asa  | K1   | 30-40  | 42,6   | 16,4       | 25,8        | 2,4       | 2,4     | 3,0     | 0,0      | 0,6      | 0,9              | 1,1         | 3,1          | 0,3                | 1,4                 | 0,2          | 0,6       | 0,0                 | 0,9          | 0,9   | 100 |
| Asa  | K1   | 40-50  | 44,7   | 14,8       | 25,4        | 2,6       | 2,6     | 3,2     | 0,0      | 0,6      | 1,0              | 1,2         | 2,8          | 0,1                | 1,4                 | 0,1          | 0,4       | 0,0                 | 0,0          | 1,5   | 100 |
| Asa  | K1   | 50-60  | 44,1   | 15,1       | 25,9        | 2,5       | 2,5     | 3,2     | 0,0      | 0,6      | 0,9              | 1,2         | 3,0          | 0,0                | 1,1                 | 0,1          | 0,9       | 0,0                 | 0,0          | 1,3   | 100 |
| Asa  | K1   | 60-70  | 44,0   | 14,9       | 26,7        | 2,2       | 2,2     | 3,4     | 0,0      | 0,6      | 0,9              | 1,5         | 3,1          | 0,3                | 0,6                 | 0,1          | 0,4       | 0,0                 | 0,2          | 1,2   | 100 |
| Asa  | K1   | 70-80  | 43,8   | 15,0       | 27,7        | 2,3       | 2,3     | 3,1     | 0,0      | 0,5      | 0,8              | 1,2         | 3,5          | 0,0                | 0,2                 | 0,2          | 1,0       | 0,0                 | 0,0          | 0,6   | 100 |
| Asa  | K1   | 80-90  | 43,8   | 14,6       | 27,9        | 2,4       | 2,4     | 3,5     | 0,0      | 0,6      | 0,8              | 1,1         | 2,8          | 0,0                | 0,4                 | 0,1          | 0,9       | 0,0                 | 0,0          | 1,0   | 100 |
| Asa  | K1   | 90-100 | 42,7   | 15,2       | 28,1        | 2,6       | 2,6     | 3,3     | 0,0      | 0,5      | 0,9              | 1,3         | 3,2          | 0,1                | 0,1                 | 0,1          | 0,7       | 0,0                 | 0,0          | 1,1   | 100 |
| Asa  | K4   | 0-10   | 45,6   | 15,2       | 23,5        | 2,2       | 2,2     | 3,0     | 0,0      | 0,6      | 0,9              | 0,6         | 2,5          | 0,2                | 2,0                 | 0,2          | 0,0       | 0,0                 | 1,6          | 1,9   | 100 |
| Asa  | K4   | 10-20  | 45,5   | 15,2       | 24,3        | 2,4       | 2,4     | 3,1     | 0,1      | 0,6      | 1,0              | 0,6         | 2,2          | 0,2                | 2,2                 | 0,2          | 0,0       | 0,0                 | 1,0          | 1,4   | 100 |
| Asa  | K4   | 20-30  | 44,8   | 15,4       | 25,2        | 2,0       | 2,0     | 3,1     | 0,0      | 0,5      | 0,9              | 0,9         | 2,1          | 0,2                | 2,3                 | 0,2          | 0,2       | 0,0                 | 2,1          | 1,0   | 100 |
| Asa  | K4   | 30-40  | 43,4   | 15,5       | 25,3        | 2,5       | 2,5     | 3,0     | 0,1      | 0,5      | 0,9              | 1,0         | 3,2          | 0,1                | 1,8                 | 0,1          | 0,1       | 0,0                 | 0,8          | 1,8   | 100 |
| Asa  | K4   | 40-50  | 41,7   | 15,8       | 25,9        | 2,5       | 2,5     | 3,0     | 0,0      | 0,5      | 0,8              | 1,3         | 4,9          | 0,0                | 0,3                 | 0,3          | 1,3       | 0,0                 | 1,3          | 0,3   | 100 |
| Asa  | K4   | 50-60  | 41,5   | 15,4       | 27,7        | 2,4       | 2,4     | 3,0     | 0,0      | 0,6      | 0,8              | 1,5         | 4,4          | 0,0                | 0,0                 | 0,3          | 1,1       | 0,0                 | 0,7          | 0,8   | 100 |
| Asa  | K4   | 60-70  | 43,4   | 15,0       | 27,6        | 2,3       | 2,3     | 3,3     | 0,0      | 0,6      | 1,0              | 1,4         | 3,4          | 0,1                | 0,3                 | 0,2          | 0,9       | 0,0                 | 0,0          | 0,4   | 100 |
| Asa  | K4   | 70-80  | 40,7   | 15,9       | 28,4        | 2,2       | 2,2     | 3,1     | 0,0      | 0,5      | 0,8              | 1,3         | 4,4          | 0,6                | 0,0                 | 0,2          | 0,9       | 0,0                 | 0,9          | 0,3   | 100 |
| Asa  | K4   | 80-90  | 41,5   | 16,1       | 28,4        | 2,5       | 2,5     | 3,4     | 0,0      | 0,5      | 0,8              | 1,5         | 3,4          | 0,3                | 0,2                 | 0,1          | 0,7       | 0,0                 | 0,0          | 0,6   | 100 |
| Asa  | K4   | 90-100 | 41,6   | 16,2       | 28,2        | 2,4       | 2,4     | 3,4     | 0,0      | 0,5      | 0,9              | 1,4         | 3,1          | 0,3                | 0,3                 | 0,2          | 1,0       | 0,0                 | 0,0          | 0,6   | 100 |
| Asa  | F3   | 0-10   | 44,5   | 14,6       | 25,3        | 2,2       | 2,2     | 3,3     | 0,1      | 0,5      | 0,8              | 1,0         | 2,4          | 0,2                | 1,2                 | 0,3          | 0,0       | 0,0                 | 1,3          | 2,5   | 100 |
| Asa  | F3   | 10-20  | 43,8   | 14,2       | 26,4        | 2,3       | 2,3     | 3,3     | 0,1      | 0,5      | 0,7              | 1,3         | 2,8          | 0,2                | 1,3                 | 0,3          | 0,0       | 0,0                 | 0,0          | 2,8   | 100 |
| Asa  | F3   | 20-30  | 41,8   | 14,5       | 26,9        | 2,3       | 2,3     | 3,7     | 0,0      | 0,5      | 0,8              | 1,7         | 3,1          | 0,1                | 0,7                 | 0,2          | 0,3       | 0,0                 | 1,8          | 1,5   | 100 |
| Asa  | F3   | 30-40  | 41,1   | 15,2       | 27,2        | 2,4       | 2,4     | 3,6     | 0,0      | 0,4      | 0,8              | 2,0         | 3,6          | 0,0                | 0,5                 | 0,2          | 0,9       | 0,0                 | 0,7          | 1,3   | 100 |
| Asa  | F3   | 40-50  | 42,5   | 15,5       | 26,4        | 2,4       | 2,4     | 3,1     | 0,0      | 0,4      | 0,7              | 1,7         | 3,3          | 0,2                | 0,1                 | 0,3          | 0,4       | 0,0                 | 2,0          | 1,1   | 100 |
| Asa  | F3   | 50-60  | 43,0   | 14,9       | 27,2        | 2,2       | 2,2     | 3,2     | 0,0      | 0,5      | 0,8              | 2,0         | 2,5          | 0,2                | 0,2                 | 0,1          | 0,5       | 0,0                 | 0,0          | 2,0   | 100 |
| Asa  | F3   | 60-70  | 42,0   | 15,2       | 27,7        | 2,6       | 2,6     | 3,3     | 0,0      | 0,4      | 0,7              | 2,0         | 2,6          | 0,0                | 0,6                 | 0,3          | 0,5       | 0,0                 | 0,0          | 2,1   | 100 |
| Asa  | F3   | 70-90  | 40,6   | 17,0       | 27,9        | 2,1       | 2,1     | 2,7     | 0,1      | 0,4      | 0,7              | 1,7         | 2,9          | 0,3                | 0,7                 | 0,1          | 0,5       | 0,0                 | 0,7          | 1,5   | 100 |
| Asa  | F4   | 0-10   | 46,7   | 14,7       | 24,0        | 1,9       | 1,9     | 2,8     | 0,1      | 0,5      | 0,8              | 0,7         | 2,9          | 0,0                | 1,1                 | 0,3          | 0,3       | 0,0                 | 1,9          | 1,3   | 100 |
| Asa  | F4   | 10-20  | 44,9   | 15,9       | 25,0        | 2,1       | 2,1     | 3,2     | 0,0      | 0,5      | 0,9              | 0,9         | 1,7          | 0,2                | 1,7                 | 0,2          | 0,2       | 0,4                 | 2,1          | 1,0   | 100 |
| Asa  | F4   | 20-30  | 44,8   | 14,9       | 25,6        | 1,9       | 1,9     | 3,1     | 0,0      | 0,6      | 0,8              | 1,2         | 3,1          | 0,3                | 0,3                 | 0,3          | 0,0       | 0,0                 | 0,8          | 1,7   | 100 |
| Asa  | F4   | 30-40  | 43,2   | 15,1       | 27,7        | 2,2       | 2,2     | 3,4     | 0,0      | 0,5      | 0,8              | 1,5         | 2,4          | 0,4                | 0,5                 | 0,2          | 0,3       | 0,0                 | 0,1          | 1,6   | 100 |
| Asa  | F4   | 40-50  | 42,2   | 15,8       | 27,8        | 2,1       | 2,1     | 3,4     | 0,0      | 0,5      | 0,7              | 1,6         | 2,6          | 0,4                | 0,5                 | 0,2          | 0,3       | 0,0                 | 0,0          | 1,8   | 100 |
| Asa  | F4   | 50-60  | 42,6   | 15,7       | 27,7        | 2,1       | 2,1     | 3,3     | 0,0      | 0,5      | 0,8              | 1,5         | 2,2          | 0,5                | 0,7                 | 0,4          | 0,3       | 0,0                 | 0,0          | 1,7   | 100 |
| Asa  | F4   | 60-70  | 43,6   | 14,4       | 27,1        | 2,2       | 2,2     | 3,4     | 0,0      | 0,6      | 0,7              | 1,8         | 2,7          | 0,2                | 0,5                 | 0,2          | 0,6       | 0,0                 | 0,0          | 1,9   | 100 |
| Asa  | F4   | 70-80  | 43,2   | 15,2       | 26,6        | 2,3       | 2,3     | 3,7     | 0,0      | 0,6      | 0,9              | 1,8         | 2,1          | 0,5                | 0,8                 | 0,4          | 0,5       | 0,0                 | 0,0          | 1,6   | 100 |
| Asa  | F4   | 80-90  | 40,7   | 15,6       | 28,6        | 2,4       | 2,4     | 3,1     | 0,0      | 0,4      | 0,8              | 1,8         | 3,6          | 0,3                | 0,1                 | 0,2          | 0,7       | 0,0                 | 0,0          | 1,6   | 100 |
| Asa  | F4   | 90-100 | 42,8   | 15,2       | 28,9        | 1,9       | 1,9     | 3,1     | 0,0      | 0,5      | 0,8              | 1,4         | 2,6          | 0,5                | 0,1                 | 0,2          | 0,3       | 0,0                 | 0,0          | 1,7   | 100 |

**Table S1b:** XRPD Mineralogical composition (weight %) of the fine-earth (<2mm) fraction of soils from Flakaliden. Diocct.=dioctahedral phyllosilicates; Trioct.=trioctahedral phyllosilicates.

| Site       | Plot | Depth | Quartz | K-feldspar | Plagioclase | Amphibole | Epidote | Anatase | Ilmenite | Hematite | Chlorite trioct. | Mica dioct. | Mica trioct. | Vermiculite dioct. | Vermiculite trioct. | Hydrobiotite | Kaolinite | Allophane | Ferrihydrate | Total |     |
|------------|------|-------|--------|------------|-------------|-----------|---------|---------|----------|----------|------------------|-------------|--------------|--------------------|---------------------|--------------|-----------|-----------|--------------|-------|-----|
| Flakaliden | 11B  | 0-10  | 51,1   | 17,0       | 22,7        | 2,0       | 2,0     | 1,7     | 0,0      | 0,5      | 0,2              | 0,2         | 2,2          | 0,2                | 1,3                 | 0,0          | 0,9       | 0,0       | 0,0          | 0,1   | 100 |
| Flakaliden | 11B  | 10-20 | 47,1   | 14,2       | 22,7        | 2,9       | 2,9     | 2,0     | 0,0      | 0,4      | 0,2              | 0,6         | 3,2          | 0,0                | 1,0                 | 0,0          | 0,8       | 0,0       | 2,9          | 2,0   | 100 |
| Flakaliden | 11B  | 20-30 | 40,8   | 14,2       | 24,7        | 3,8       | 3,8     | 1,9     | 0,0      | 0,3      | 0,3              | 1,3         | 3,4          | 0,1                | 0,7                 | 0,2          | 0,3       | 0,0       | 5,3          | 2,8   | 100 |
| Flakaliden | 11B  | 30-40 | 39,3   | 13,6       | 25,5        | 4,7       | 4,7     | 2,5     | 0,0      | 0,2      | 0,2              | 1,9         | 3,8          | 0,1                | 0,7                 | 0,2          | 0,5       | 0,0       | 3,4          | 3,3   | 100 |
| Flakaliden | 11B  | 40-50 | 38,6   | 14,2       | 27,5        | 5,0       | 5,0     | 2,3     | 0,0      | 0,1      | 0,2              | 2,0         | 4,8          | 0,2                | 0,0                 | 0,2          | 1,8       | 0,0       | 0,9          | 2,3   | 100 |
| Flakaliden | 11B  | 50-60 | 40,6   | 13,5       | 25,9        | 2,6       | 2,6     | 2,6     | 0,0      | 0,2      | 0,3              | 2,0         | 4,5          | 0,7                | 0,2                 | 0,2          | 1,4       | 0,0       | 0,8          | 2,1   | 100 |
| Flakaliden | 11B  | 60-70 | 40,8   | 14,4       | 26,3        | 2,7       | 2,7     | 1,4     | 0,0      | 0,1      | 0,1              | 1,7         | 4,1          | 1,4                | 0,3                 | 0,2          | 2,1       | 0,0       | 2,7          | 1,9   | 100 |
| Flakaliden | 15A  | 0-10  | 48,1   | 17,4       | 24,6        | 3,4       | 3,4     | 1,3     | 0,0      | 0,4      | 0,2              | 0,2         | 3,0          | 0,0                | 0,3                 | 0,0          | 1,1       | 0,0       | 0,0          | 1,0   | 100 |
| Flakaliden | 15A  | 10-20 | 42,1   | 14,2       | 23,7        | 6,0       | 6,0     | 1,6     | 0,0      | 0,3      | 0,2              | 1,0         | 2,4          | 0,0                | 1,4                 | 0,1          | 0,8       | 0,0       | 3,7          | 2,6   | 100 |
| Flakaliden | 15A  | 20-30 | 38,7   | 14,7       | 26,1        | 4,9       | 4,9     | 1,6     | 0,0      | 0,1      | 0,2              | 1,8         | 2,5          | 0,4                | 0,8                 | 0,2          | 0,3       | 0,4       | 5,6          | 2,3   | 100 |
| Flakaliden | 15A  | 30-40 | 38,4   | 18,2       | 32,3        | 2,6       | 2,6     | 1,4     | 0,0      | 0,1      | 0,2              | 1,3         | 2,2          | 0,8                | 0,2                 | 0,0          | 0,8       | 0,0       | 0,6          | 0,8   | 100 |
| Flakaliden | 15A  | 40-50 | 39,8   | 18,2       | 29,4        | 3,4       | 3,4     | 1,8     | 0,0      | 0,2      | 0,2              | 1,4         | 3,0          | 0,8                | 0,0                 | 0,1          | 1,4       | 0,0       | 0,0          | 0,3   | 100 |
| Flakaliden | 15A  | 50-60 | 40,8   | 16,7       | 28,7        | 3,8       | 3,8     | 2,0     | 0,0      | 0,2      | 0,2              | 1,8         | 3,2          | 0,8                | 0,0                 | 0,0          | 0,8       | 0,0       | 0,0          | 1,0   | 100 |
| Flakaliden | 15A  | 60-70 | 40,8   | 15,9       | 29,3        | 3,9       | 3,9     | 2,1     | 0,0      | 0,2      | 0,2              | 1,5         | 3,0          | 0,8                | 0,0                 | 0,0          | 1,1       | 0,0       | 0,0          | 1,0   | 100 |
| Flakaliden | 15A  | 70-80 | 37,4   | 17,1       | 29,0        | 3,9       | 3,9     | 1,7     | 0,0      | 0,2      | 0,2              | 1,8         | 4,5          | 1,0                | 0,0                 | 0,1          | 1,4       | 0,0       | 0,5          | 1,1   | 100 |
| Flakaliden | 14B  | 0-10  | 54,6   | 15,8       | 23,1        | 1,8       | 1,8     | 1,1     | 0,0      | 0,5      | 0,1              | 0,0         | 1,9          | 0,1                | 0,3                 | 0,0          | 0,6       | 0,0       | 0,0          | 0,0   | 100 |
| Flakaliden | 14B  | 10-20 | 51,4   | 16,9       | 23,4        | 2,1       | 2,1     | 1,1     | 0,0      | 0,3      | 0,2              | 0,1         | 2,7          | 0,1                | 0,2                 | 0,0          | 0,8       | 0,0       | 0,0          | 0,0   | 100 |
| Flakaliden | 14B  | 20-30 | 47,0   | 14,5       | 23,8        | 3,1       | 3,1     | 1,9     | 0,0      | 0,4      | 0,3              | 0,5         | 4,1          | 0,0                | 0,8                 | 0,1          | 1,2       | 0,0       | 0,7          | 1,7   | 100 |
| Flakaliden | 14B  | 30-40 | 39,4   | 14,1       | 23,9        | 4,3       | 4,3     | 1,9     | 0,0      | 0,2      | 0,3              | 1,7         | 4,1          | 0,0                | 0,7                 | 0,1          | 0,8       | 0,0       | 5,9          | 2,7   | 100 |
| Flakaliden | 14B  | 40-50 | 40,4   | 13,6       | 27,0        | 4,4       | 4,4     | 2,4     | 0,0      | 0,2      | 0,2              | 1,9         | 3,7          | 0,2                | 0,5                 | 0,3          | 1,1       | 0,0       | 1,8          | 2,3   | 100 |
| Flakaliden | 14B  | 50-60 | 39,7   | 14,4       | 28,1        | 4,8       | 4,8     | 2,4     | 0,0      | 0,3      | 0,2              | 1,9         | 4,4          | 0,3                | 0,2                 | 0,3          | 1,3       | 0,0       | 0,5          | 1,4   | 100 |
| Flakaliden | 14B  | 60-70 | 40,7   | 14,3       | 26,6        | 5,1       | 5,1     | 2,6     | 0,0      | 0,3      | 0,2              | 2,0         | 4,5          | 0,2                | 0,1                 | 0,3          | 1,5       | 0,0       | 0,1          | 1,5   | 100 |
| Flakaliden | 14B  | 70-80 | 40,2   | 15,5       | 27,9        | 4,2       | 4,2     | 2,1     | 0,0      | 0,2      | 0,2              | 2,0         | 3,7          | 0,6                | 0,2                 | 0,3          | 1,6       | 0,0       | 0,0          | 1,4   | 100 |
| Flakaliden | 14B  | 80-90 | 40,1   | 15,5       | 27,7        | 4,2       | 4,2     | 1,9     | 0,0      | 0,2      | 0,2              | 1,8         | 4,0          | 1,2                | 0,0                 | 0,1          | 1,6       | 0,0       | 0,0          | 1,5   | 100 |









**Table S6:** Raw data for calculations of mineral phases detected by XRPD and their measured elemental composition as determined by electron microprobe analysis (EMPA).

| Site | Mineral name                      | Mineral formula                                | Number of samples | SiO2  | Al2O3 | TiO2 | FeO   | MgO  | MnO | CaO  | K2O  | Na2O | BaO  | NiO | Cr2O3 | V2O3 | Total |
|------|-----------------------------------|------------------------------------------------|-------------------|-------|-------|------|-------|------|-----|------|------|------|------|-----|-------|------|-------|
| FA   | K-feldspar                        | $K_{0.92}Na_{0.07}Al_{0.99}Si_{3.02}O_8$       | 58                | 65.8  | 18.4  | 0.0  | 0.0   | 0.0  | 0.0 | 0.0  | 0.0  | 15.7 | 0.4  | 0.3 | 0.0   | 0.0  | 100.6 |
| FA   | Albite <sup>a</sup>               | $K_{0.01}Na_{0.99}Ca_{0.01}Al_{1.00}Si_{2.99}$ | 53                | 68.3  | 19.9  | 0.0  | 0.0   | 0.1  | 0.0 | 0.0  | 0.6  | 0.2  | 10.8 | 0.0 | 0.0   | 0.0  | 100.1 |
| F    | NaCa Plagioclase <sup>a</sup>     | $K_{0.01}Na_{0.68}Ca_{0.27}Al_{1.22}Si_{2.7}$  | 42                | 62.0  | 23.9  | 0.0  | 0.0   | 0.1  | 0.0 | 0.0  | 5.7  | 0.2  | 7.9  | 0.0 | 0.0   | 0.0  | 100.0 |
| A    | NaCa Plagioclase <sup>a</sup>     | $K_{0.01}Na_{0.75}Ca_{0.23}Al_{1.23}Si_{2.8}$  | 32                | 63.8  | 22.9  | 0.0  | 0.0   | 0.1  | 0.0 | 0.0  | 4.1  | 0.2  | 8.8  | 0.0 | 0.0   | 0.0  | 99.9  |
| FA   | Amphibole                         | $K_{0.01}Na_{0.23}Ca_{1.23}Mg_{2.99}Mr$        | 22                | 48.4  | 7.9   | 0.8  | 14.3  | 13.0 | 0.3 | 11.1 | 0.4  | 1.0  | 0.0  | 0.0 | 0.1   | 0.1  | 97.5  |
| F    | Epidote <sup>b</sup>              | $Ca_{1.99}Mg_{0.01}Mn_{0.01}Al_{2.99}F_1$      | 17                | 38.5  | 24.4  | 0.1  | 11.2  | 0.2  | 0.2 | 21.2 | 0.0  | 0.0  | 0.0  | 0.0 | 0.0   | 0.1  | 95.9  |
| A    | Epidote <sup>b</sup>              | $Ca_{1.88}Mg_{0.02}Mn_{0.02}Al_{2.7}F_1$       | 29                | 38.9  | 23.3  | 0.1  | 12.0  | 0.0  | 0.3 | 21.9 | 0.0  | 0.0  | 0.0  | 0.0 | 0.0   | 0.0  | 96.5  |
| FA   | Chlorite trioc.                   | $Mg_{3.99}Mn_{0.01}Al_{4.99}Fe(II)_{0.9}$      | 1                 | 24.5  | 15.1  | 1.0  | 24.0  | 10.7 | 0.3 | 0.4  | 0.8  | 0.1  | 0.0  | 0.0 | 0.0   | 0.1  | 76.8  |
| F    | Mica dioc. <sup>b</sup>           | $K_{1.78}Na_{0.08}Mg_{0.14}Ti_{0.09}Al_{1.1}$  | 2                 | 46.5  | 35.2  | 0.5  | 1.2   | 0.7  | 0.0 | 0.0  | 10.4 | 0.3  | 0.1  | 0.0 | 0.0   | 0.0  | 94.9  |
| A    | Mica dioc. <sup>b</sup>           | $K_{1.41}Na_{0.39}Mg_{0.08}Ti_{0.09}Al_{1.1}$  | 2                 | 44.4  | 34.7  | 0.3  | 1.3   | 0.3  | 0.0 | 0.0  | 8.0  | 1.1  | 0.3  | 0.0 | 0.0   | 0.0  | 90.7  |
| FA   | Mica trioc.                       | $K_{1.78}Na_{0.08}Mg_{0.14}Mn_{0.01}Ti$        | 4                 | 35.4  | 17.6  | 2.8  | 21.1  | 7.9  | 0.2 | 0.0  | 8.9  | 0.1  | 0.2  | 0.0 | 0.1   | 0.0  | 94.3  |
| FA   | Hydrobiotite                      | $K_{0.54}Na_{0.04}Ca_{0.18}Mg_{2.99}Mr$        | 36                | 36.6  | 18.7  | 2.1  | 15.5  | 11.2 | 0.3 | 0.6  | 2.7  | 0.1  | 0.1  | 0.0 | 0.0   | 0.0  | 88.0  |
| FA   | Vermiculite dioc. <sup>ca</sup>   | $Ca_{0.77}Al_{1.99}Si_{6.59}O_{20}(OH)_4$      | 0                 | 52.1  | 37.4  | 0.0  | 0.0   | 0.0  | 0.0 | 5.6  | 0.0  | 0.0  | 0.0  | 0.0 | 0.0   | 0.0  | 95.2  |
| FA   | Vermiculite trioc. <sup>ca</sup>  | $Mg_{3.59}Al_{1.06}Fe(II)_{1.06}Si_{5.59}($    | 0                 | 37.7  | 17.5  | 0.0  | 24.6  | 16.1 | 0.0 | 0.0  | 0.0  | 0.0  | 0.0  | 0.0 | 0.0   | 0.0  | 95.9  |
| FA   | Kaolinite <sup>ca</sup>           | $Al_2Si_2O_5(OH)_4$                            | 0                 | 46.6  | 39.5  | 0.0  | 0.0   | 0.0  | 0.0 | 0.0  | 0.0  | 0.0  | 0.0  | 0.0 | 0.0   | 0.0  | 86.1  |
| FA   | Ferrihydrite <sup>ca</sup>        | $Fe(III)_{0.5}(H_2O)_9$                        | 0                 | 0.0   | 0.0   | 0.0  | 83.1  | 0.0  | 0.0 | 0.0  | 0.0  | 0.0  | 0.0  | 0.0 | 0.0   | 0.0  | 83.1  |
| FA   | Ilmenite <sup>ca</sup>            | $Fe(II)TiO_3$                                  | 0                 | 0.0   | 0.0   | 0.0  | 52.7  | 47.4 | 0.0 | 0.0  | 0.0  | 0.0  | 0.0  | 0.0 | 0.0   | 0.0  | 100.0 |
| FA   | Anatase <sup>ca</sup>             | $TiO_2$                                        | 0                 | 0.0   | 0.0   | 0.0  | 100.0 | 0.0  | 0.0 | 0.0  | 0.0  | 0.0  | 0.0  | 0.0 | 0.0   | 0.0  | 100.0 |
| FA   | Hematite <sup>ca</sup>            | $Fe_2O_3$                                      | 0                 | 0.0   | 0.0   | 0.0  | 100.0 | 0.0  | 0.0 | 0.0  | 0.0  | 0.0  | 0.0  | 0.0 | 0.0   | 0.0  | 100.0 |
| FA   | Quartz <sup>ca</sup>              | $SiO_2$                                        | 0                 | 100.0 | 0.0   | 0.0  | 0.0   | 0.0  | 0.0 | 0.0  | 0.0  | 0.0  | 0.0  | 0.0 | 0.0   | 0.0  | 100.0 |
| FA   | Imogolite/Allophane <sup>ca</sup> | $SiO_2 \cdot Al_2O_3 \cdot 2.5 H_2O$           | 0                 | 29.0  | 49.2  | 0.0  | 0.0   | 0.0  | 0.0 | 0.0  | 0.0  | 0.0  | 0.0  | 0.0 | 0.0   | 0.0  | 78.3  |

<sup>a</sup>Iron is unlikely to occur in feldspars. Its occurrence in the electron microprobe data can be due to coatings

<sup>b</sup>All iron is recalculated as ferric iron

<sup>c</sup>Assumed elemental composition with similar Fe/Mg ratios to potential parent micas

<sup>d</sup>Assumed elemental composition according to Dixon and Schulze, 2002

<sup>e</sup>Raw data are calculated using the mineral budgeting approach according to Andrist-Rangel et al. 2006
